# Supplementary material
Source: PubMed Central journal article supplement (PMC3307280)

Supplemental Fig.4

|             |   |                                                                                                          |
|-------------|---|----------------------------------------------------------------------------------------------------------|
| Sk-EV006    | 1 | GDRVADVIESSIGDSVSRAL <sup>▼▼</sup> TQALPAPT <sup>☆☆</sup> GQNTQVSSHRLDTGEV <sup>☆</sup> PALQAAEIGASSNTSD |
| Ngoya       | 1 | .....M.....                                                                                              |
| 1095        | 1 | .....R.....K.....A..                                                                                     |
| FY          | 1 | .....H.....K.....A..                                                                                     |
| 75-Yamagata | 1 | .....K.....A..                                                                                           |
| KED005      | 1 | .....K.....A..                                                                                           |
| 02363       | 1 | .....K.....A..                                                                                           |
| BrCr        | 1 | .....K..P.....PD.....K.....A..                                                                           |

|             |    |                                                                                          |
|-------------|----|------------------------------------------------------------------------------------------|
| Sk-EV006    | 61 | ESMIETRCV <sup>▼</sup> LNSHSTAETTLDSFFSRAGLVGEIDLPLEGTTNPN <sup>☆</sup> GYANWDIDITGYAQMR |
| Nagoya      | 61 | .....                                                                                    |
| 1095        | 61 | .....                                                                                    |
| FY          | 61 | .....                                                                                    |
| 75-Yamagata | 61 | .....                                                                                    |
| KED005      | 61 | .....                                                                                    |
| 02363       | 61 | .....K.....                                                                              |
| BrCr        | 61 | .....K.....                                                                              |

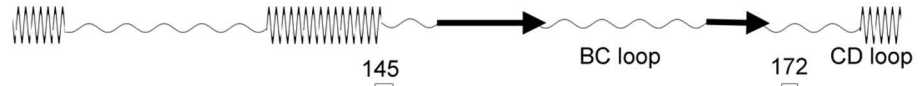

|             |     |                                                                                                                                                      |
|-------------|-----|------------------------------------------------------------------------------------------------------------------------------------------------------|
| Sk-EV006    | 121 | RKVELFTYMRFD <sup>☆</sup> AEFT <sup>☆</sup> FVACTPTGGVVPQLLQ <sup>☆</sup> YMFVPPGAPK <sup>☆☆☆</sup> PESRESLAW <sup>☆</sup> QTATN <sup>☆☆☆</sup> PSVF |
| Nagoya      | 121 | .....E.....                                                                                                                                          |
| 1095        | 121 | .....D.....                                                                                                                                          |
| FY          | 121 | .....Q.....D.....                                                                                                                                    |
| 75-Yamagata | 121 | .....E.....D.....                                                                                                                                    |
| KED005      | 121 | .....E.....D.....                                                                                                                                    |
| 2363        | 121 | .....E.....D.....                                                                                                                                    |
| BrCr        | 121 | .....R.....D..D.....P.....                                                                                                                           |

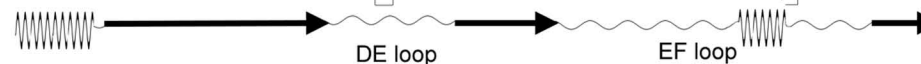

|             |     |                                                                                                                                                                                                 |
|-------------|-----|-------------------------------------------------------------------------------------------------------------------------------------------------------------------------------------------------|
| Sk-EV006    | 181 | VKL <sup>▼▼</sup> TDP <sup>☆☆</sup> PAQVSV <sup>☆</sup> PF <sup>☆</sup> MSPASAYQWFYDGYPTFGEHKQE <sup>☆☆</sup> KDLEYGACPN <sup>☆☆</sup> NMMGT <sup>☆☆</sup> FSV <sup>☆☆</sup> RTVGS <sup>▼</sup> |
| Nagoya      | 181 | .....                                                                                                                                                                                           |
| 1095        | 181 | ...S.....T                                                                                                                                                                                      |
| FY          | 181 | ...S.....T                                                                                                                                                                                      |
| 75-Yamagata | 181 | ...S.....T                                                                                                                                                                                      |
| KED005      | 181 | ...S.....T                                                                                                                                                                                      |
| 02363       | 181 | ...S.....T                                                                                                                                                                                      |
| BrCr        | 181 | ..SS.....                                                                                                                                                                                       |

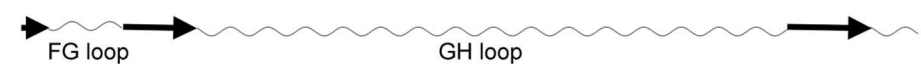

|             |     |                                                                                                                     |
|-------------|-----|---------------------------------------------------------------------------------------------------------------------|
| Sk-EV006    | 241 | LKSKYPLVVRIYMRMKHVRAWI <sup>▼</sup> PRPMRNQNYL <sup>☆☆☆</sup> FKANPNYAGNSIKPTGT <sup>☆☆</sup> SRTAITTL <sup>▼</sup> |
| Nagoya      | 241 | S.....I.....N.....                                                                                                  |
| 1095        | 241 | S.....A.....                                                                                                        |
| FY          | 241 | S.....A.....                                                                                                        |
| 75-Yamagata | 241 | S.....A.....                                                                                                        |
| KED005      | 241 | S.....I.....V.....                                                                                                  |
| 02363       | 241 | S.....I.....                                                                                                        |
| BrCr        | 241 | S..E.S..I.....S.....D.....                                                                                          |

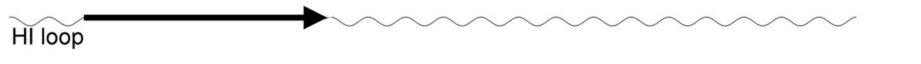

Supplement: supp_M111.301622_jbc.M111.301622-5.pdf [file supp_M111.301622_jbc.M111.301622-5.pdf]
