# Supplementary material
Source: PubMed Central journal article supplement (PMC3307280)
Supplement: supp_M111.301622_jbc.M111.301622-3.pdf [file supp_M111.301622_jbc.M111.301622-3.pdf]

Supplemental Fig.2

Mouse 1 MGRCCFYTAGTLSLLLLVTSVTLVAVRVFQKAVDQTIKNNMVLQNGTKVFNSWEKPPLPV  
 Hamster 1 .....A.....R...E..D.....  
 Human 1 .....S...KI..R...EA..D.....  
 Horseshoe 1 .....AV.....E.....I..K..SET..D..K.....

Mouse 61 YIQFYFFNVTNPEEILQGEIPLLEEVGPYTYRELRNKANIQFGENGTTISAVTNKAYVFE  
 Hamster 61 .T.....I..Q.....S.....  
 Human 61 .T.....R..T..RV.....D.....S.....  
 Horseshoe 61 .S.....A...R...R.....I..S..ED...D...V..TS.....L

**HVR1**

Mouse 121 RNQSVGDPNVDLIRTINIPLLTVDLAQLTLRELIEAMLKAYQQKLFVIHTVHELLWGY  
 Hamster 121 .....S.....E..MP..K..I.....T.....T.....  
 Human 121 .D.....KI...L...V...IEWS.VHF...I.....T...D.....  
 Horseshoe 121 .D.....K..S...L...AV..AMEW..QHF...VI..Q..L.....EF..TR..DD.....

**HVR2**

Mouse 181 KDEILSIIVHIFKPDVSPNIFGLFYERNGTNDGEYVFLTGEDNYLNFSKIIVENWGKTSLDWW  
 Hamster 181 .....I.....K.....D.....T.....  
 Human 181 .....I..V..R..I..Y.....K.....D.....S...T.....  
 Horseshoe 181 .....I..T..R..S..I..Y.....Y..GK.....D.....

**HVR3**

Mouse 241 TTDTCNMINGTDGDSFHPLISKDEVLYLFPSDLCRSVHITFSSFENVEGLPAFRYKVPAE  
 Hamster 241 ..E.....T.....V...F.....G..T.....  
 Human 241 I..K.....T.....V...F...Y...DY..S..Q.....  
 Horseshoe 241 ..K.....I.....T.....I...F...I..Y...D..S..Q.....T..E..

**HVR4**

Mouse 301 ILANTSENAGFCIPEGNCMDSGVLNISICKNGAPIIMSFPHFYQADEKFSVAIKGMHPNK  
 Hamster 301 .....V.....V..V.....R...  
 Human 301 .....D.....LG...V.....R...E...Q  
 Horseshoe 301 .....D.....K...LG...V..V.....L...S.....R..I..E...S..

Mouse 361 EEHESFVDINPLTGIILRGAKRFQINTYVRKLDDEFVETGDIRTMVFPVMYLNESVLIDKE  
 Hamster 361 .D.....A.....K..I..GI...N.....  
 Human 361 .D..T.....KA.....I..K.....H...  
 Horseshoe 361 .Y..T.....V...A.....I..E..I...I...N.....V.....

Mouse 421 TANQLKSVINTTLVVTNIPYIIMALGVFFGLVFTWLACRGQGSMDDEGTADERAPLIIRT  
 Hamster 421 ..SR...TS...I.....L.....P.....  
 Human 421 ..SR...M...II.....K.....  
 Horseshoe 421 ..SR...V...II.....G..G.....

Human SCARB2 accession number: NP\_005497 ref: PUBMED 1374238  
 Horseshoe bat SCARB2 accession number: JF965374 ref: this study  
 Mouse SCARB2 accession number: NP\_031670 ref: PUBMED 9399579  
 Hamster SCARB2 accession number: JF965373 ref: this study
