# Supplementary material
Source: PubMed Central journal article supplement (PMC3307280)

Supplemental Fig. 1

A

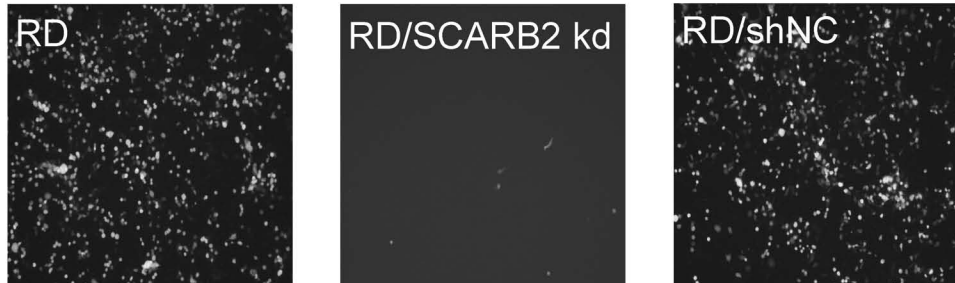

B

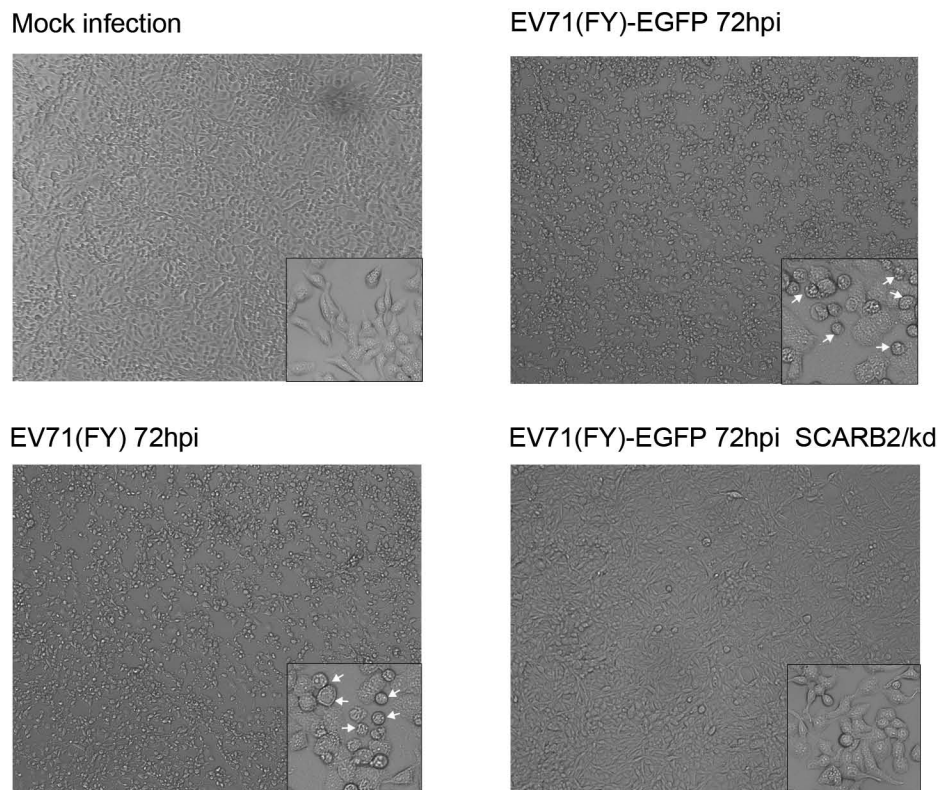

Supplement: supp_M111.301622_jbc.M111.301622-2.pdf [file supp_M111.301622_jbc.M111.301622-2.pdf]

Supplemental Fig. 5

A

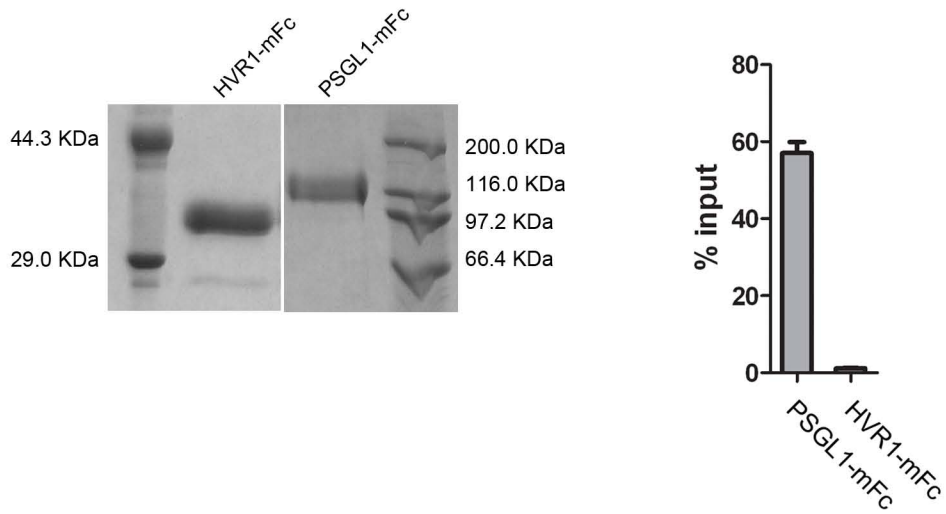

B

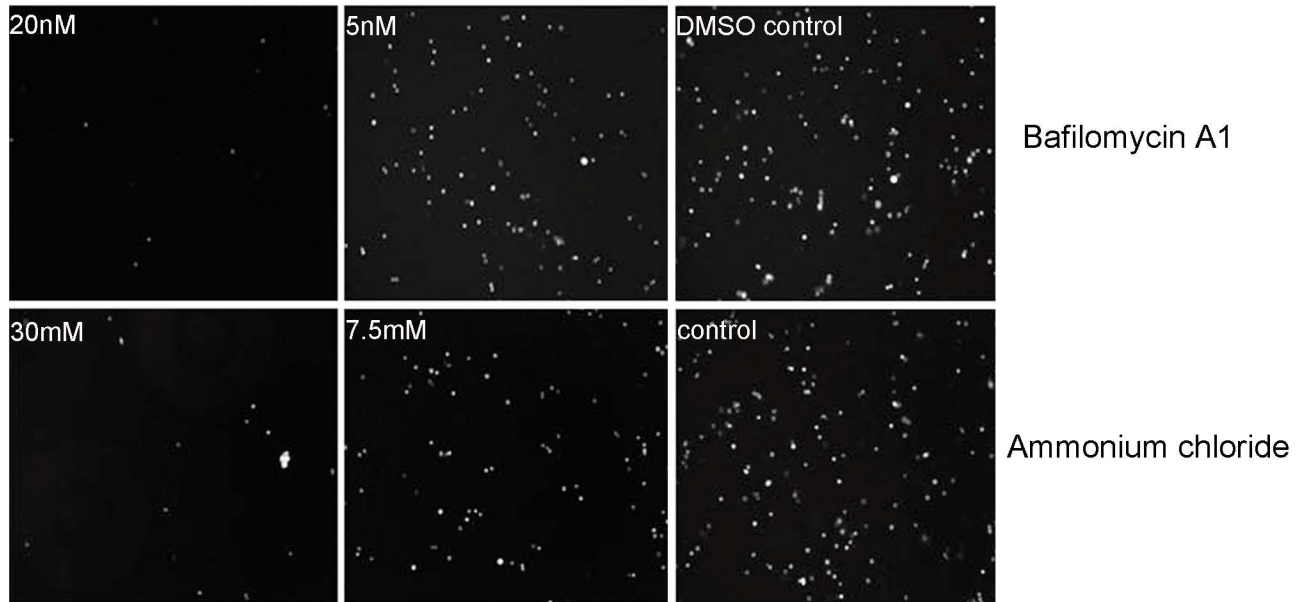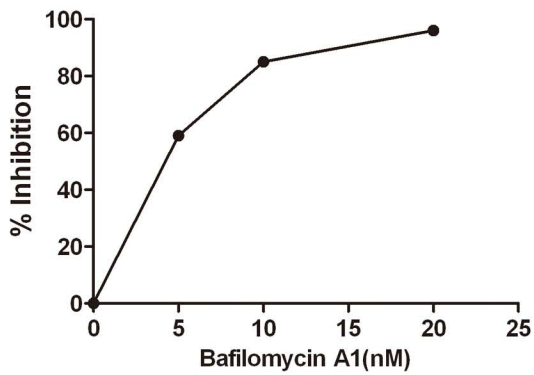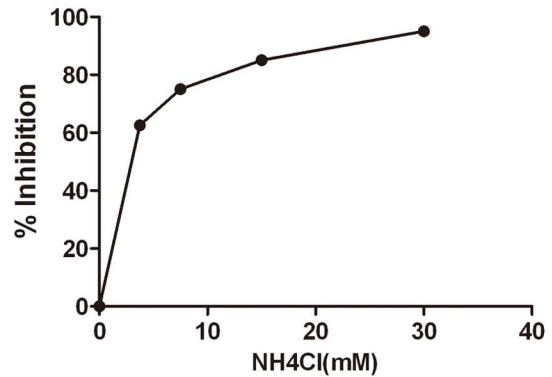

Supplement: supp_M111.301622_jbc.M111.301622-6.pdf [file supp_M111.301622_jbc.M111.301622-6.pdf]
